# Supplementary material
Source: HighWire-hosted journal article supplement (https://bmjopen.bmj.com/content/10/3/e032914)
Supplement: inline-supplementary-material-1 [file inline-supplementary-material-1.pdf]

## Duration of sick leave after active surveillance, surgery, or radiotherapy for localized prostate cancer: a nationwide cohort study

### Supplementary material

**Supplemental Figure 1.** Illustration of the multi-state model with arrows representing possible transitions (see Supplementary Table 1 for number of events for each transition)

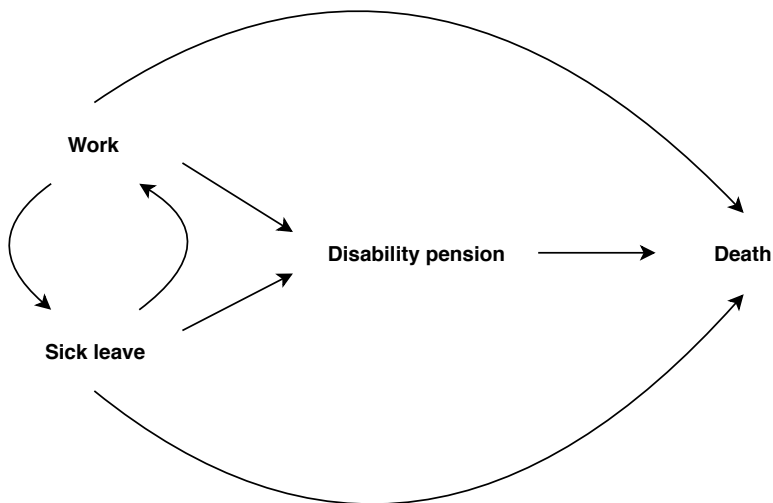

**Supplementary Table 1.** Number of events for each transition in the multi-state model, stratified by treatment strategy (see footnote for median follow-up time)

| <b>Transition</b>               | <b>AS</b>       | <b>RP</b>       | <b>RT</b>       | <b>PCa-free men</b> |
|---------------------------------|-----------------|-----------------|-----------------|---------------------|
|                                 | <i>n</i> events | <i>n</i> events | <i>n</i> events | <i>n</i> events     |
| Work → sick leave               | 2246            | 9540            | 1229            | 17836               |
| Work → disability pension       | 11              | 4               | 2               | 71                  |
| Work → death                    | 26              | 43              | 13              | 473                 |
| Sick leave → work               | 2024            | 9094            | 1127            | 15491               |
| Sick leave → disability pension | 24              | 52              | 22              | 340                 |
| Sick leave → death              | 24              | 38              | 4               | 331                 |
| Disability pension → death      | 8               | 4               | 3               | 30                  |

*Abbreviations:* AS, active surveillance; PCa, prostate cancer; RT, radiotherapy; RP, radical prostatectomy  
 Median follow-up [in years (IQR)]: AS 2.4 (1.2-4.0); RP 3.3 (1.7-5.4); RT 3.1 (1.6-5.2); PCa-free men 2.9 (1.5-5.0)

**Supplemental Figure 2.** Illustration of the cause-specific multi-state model with arrows representing possible transitions. For simplicity, transitions to/from cause-specific sick leave, disability pension receipt, and death are illustrated with one arrow (see Supplementary Table 2 for all possible transitions together with the number of events for each transition)

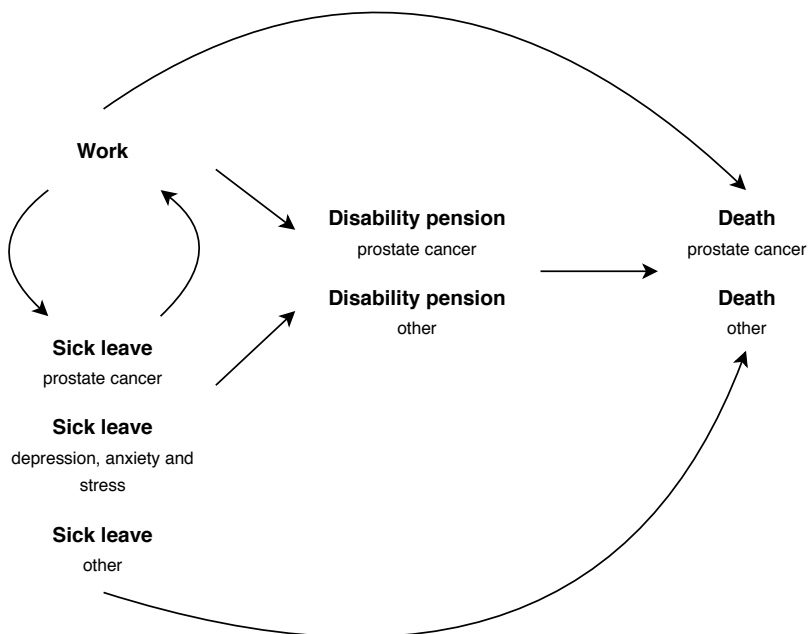

**Supplementary Table 2.** Number of events for each transition in the cause-specific multi-state model, stratified by treatment strategy (see footnote for median follow-up time)

| Transition                                                      | AS              | RP              | RT              | PCa-free men    |
|-----------------------------------------------------------------|-----------------|-----------------|-----------------|-----------------|
|                                                                 | <i>n</i> events | <i>n</i> events | <i>n</i> events | <i>n</i> events |
| Work → sick leave prostate cancer                               | 821             | 6514            | 626             | 7               |
| Work → sick leave depression                                    | 166             | 361             | 69              | 1847            |
| Work → sick leave other                                         | 1259            | 2665            | 534             | 15982           |
| Work → disability pension prostate cancer                       | 2               | 0               | 0               | 0               |
| Work → disability pension other                                 | 9               | 4               | 2               | 71              |
| Work → death prostate cancer                                    | 0               | 4               | 1               | 0               |
| Work → death other                                              | 26              | 39              | 12              | 473             |
| Sick leave prostate cancer → work                               | 779             | 6365            | 601             | 0               |
| Sick leave prostate cancer → disability pension prostate cancer | 0               | 7               | 0               | 0               |
| Sick leave prostate cancer → disability pension other           | 2               | 5               | 0               | 0               |
| Sick leave prostate cancer → death prostate cancer              | 2               | 7               | 1               | 0               |
| Sick leave prostate cancer → death other                        | 0               | 3               | 0               | 0               |
| Sick leave depression → work                                    | 136             | 307             | 57              | 1511            |
| Sick leave depression → disability pension prostate cancer      | 0               | 0               | 1               | 0               |
| Sick leave depression → disability pension other                | 5               | 5               | 4               | 40              |
| Sick leave depression → death prostate cancer                   | 0               | 0               | 0               | 0               |
| Sick leave depression → death other                             | 0               | 3               | 0               | 16              |
| Sick leave other → work                                         | 1109            | 2422            | 469             | 13980           |
| Sick leave other → disability pension prostate cancer           | 0               | 1               | 0               | 0               |
| Sick leave other → disability pension other                     | 17              | 34              | 17              | 300             |
| Sick leave other → death prostate cancer                        | 0               | 1               | 0               | 0               |
| Sick leave other → death other                                  | 22              | 24              | 3               | 315             |
| Disability pension prostate cancer → death prostate cancer      | 0               | 0               | 0               | 0               |
| Disability pension prostate cancer → death other                | 0               | 1               | 0               | 0               |
| Disability pension other → death prostate cancer                | 0               | 0               | 0               | 0               |
| Disability pension other → death other                          | 8               | 3               | 3               | 30              |

Abbreviations: AS, active surveillance; PCa, prostate cancer; RT, radiotherapy; RP, radical prostatectomy  
 Median follow-up [in years (IQR)]: AS 2.4 (1.2-4.0); RP 3.3 (1.7-5.4); RT 3.1 (1.6-5.2); PCa-free men 2.9 (1.5-5.0)

**Supplementary Table 3.** Model specification for predicting differences in length of stay on sick leave from adjusted cause-specific multi-state model

| Transition*                                              | df for baseline hazard function† | df for time-dependent effects† | Variables with time-dependent effects |
|----------------------------------------------------------|----------------------------------|--------------------------------|---------------------------------------|
| 1. Work → sick leave prostate cancer                     | 4                                | 2                              | Initial treatment strategy            |
| 2. Work → sick leave depression                          | 3                                | 1                              | Initial treatment strategy            |
| 3. Work → sick leave other                               | 3                                | 2                              | Initial treatment strategy            |
| 4. Work → disability pension/death                       | 1                                | 0                              |                                       |
| 5. Sick leave prostate cancer → work                     | 4                                | 2                              | Initial treatment strategy            |
| 6. Sick leave prostate cancer → disability pension/death | 1                                | 0                              |                                       |
| 7. Sick leave depression → work                          | 3                                | 1                              | Initial treatment strategy            |
| 8. Sick leave depression → disability pension/death      | 1                                | 0                              |                                       |
| 9. Sick leave other → work                               | 3                                | 1                              | Initial treatment strategy            |
| 10. Sick leave other → disability pension/death          | 1                                | 0                              |                                       |

\* Disability pension and death were combined into one state to reduce the number of transitions

† Knots selection was guided by the BIC.

In addition to type of initial treatment and time since diagnosis, the following covariates were adjusted for: age at diagnosis (<55, 55–59, 60–64), calendar period of diagnosis (2007–2009, 2010–2012, 2013–2016), region of residence (six geographical areas), education [low (0–9 yr), middle (10–12 yr), high (> 12 yr)], income [based on the income distribution of prostate cancer-free men (1–20%, 21–40%, 41–60%, 61–80%, 81–100%)], prior sick leave (no, yes), T stage (T1, T2), PSA (< 4, 4–9, 10–19 ng/ml), and Gleason Grade Group. (Models for transitions 4, 6, 8, and 10 only included tumor characteristics due to few events). All analyses were complete-case analyses.

**Supplementary Table 4.** Cause-specific percentages with 95% confidence intervals of work, sick leave, disability pension receipt, or death by initial treatment strategy and time since diagnosis in men with localized low- and intermediate-risk prostate cancer and matched prostate cancer-free men

| State               |                    |                             | Year 1           | Year 2           | Year 3           | Year 4           | Year 5           | Year 6           | Year 7           |
|---------------------|--------------------|-----------------------------|------------------|------------------|------------------|------------------|------------------|------------------|------------------|
| Active surveillance | Work               |                             | 95.9 (95.3-96.4) | 95.1 (94.3-95.7) | 94.0 (93.0-94.9) | 93.9 (92.7-94.9) | 93.7 (92.2-94.9) | 93.3 (91.4-94.8) | 91.0 (88.1-93.2) |
|                     | Sick leave         | All-cause                   | 3.8 (3.3-4.4)    | 4.1 (3.5-4.8)    | 4.6 (3.8-5.6)    | 3.9 (3.0-5.0)    | 3.1 (2.2-4.5)    | 2.3 (1.3-4.0)    | 4.2 (2.4-7.0)    |
|                     |                    | Prostate cancer             | 1.3 (1.0-1.7)    | 1.3 (0.9-1.7)    | 1.1 (0.8-1.7)    | 0.8 (0.5-1.4)    | 0.4 (0.2-1.2)    | 0.0 (0.0-0.0)    | 0.6 (0.1-2.4)    |
|                     |                    | Depression, anxiety, stress | 0.4 (0.2-0.6)    | 0.6 (0.4-0.9)    | 0.8 (0.5-1.2)    | 0.3 (0.1-0.8)    | 0.4 (0.2-1.0)    | 0.6 (0.2-1.7)    | 0.3 (0.0-1.8)    |
|                     |                    | Other                       | 2.1 (1.7-2.5)    | 2.2 (1.8-2.8)    | 2.7 (2.1-3.5)    | 2.7 (2.0-3.7)    | 2.3 (1.5-3.4)    | 1.7 (0.9-3.2)    | 3.4 (1.9-6.1)    |
|                     | Disability pension | All-cause                   | 0.0 (0.0-0.2)    | 0.2 (0.1-0.4)    | 0.5 (0.3-0.8)    | 0.8 (0.5-1.3)    | 1.3 (0.8-2.0)    | 1.7 (1.1-2.7)    | 1.7 (1.0-2.9)    |
|                     |                    | Prostate cancer             | 0.0 (0.0-0.0)    | 0.0 (0.0-0.0)    | 0.0 (0.0-0.3)    | 0.0 (0.0-0.3)    | 0.0 (0.0-0.3)    | 0.2 (0.0-0.7)    | 0.2 (0.0-0.7)    |
|                     |                    | Other                       | 0.0 (0.0-0.2)    | 0.2 (0.1-0.4)    | 0.4 (0.2-0.8)    | 0.8 (0.5-1.3)    | 1.3 (0.8-2.0)    | 1.5 (1.0-2.5)    | 1.6 (0.9-2.7)    |
|                     | Death              | All-cause                   | 0.3 (0.2-0.5)    | 0.7 (0.5-1.0)    | 0.9 (0.6-1.3)    | 1.3 (1.0-1.9)    | 1.9 (1.4-2.6)    | 2.7 (1.9-3.8)    | 3.1 (2.2-4.4)    |
|                     |                    | Prostate cancer             | 0.0 (0.0-0.0)    | 0.0 (0.0-0.0)    | 0.0 (0.0-0.0)    | 0.0 (0.0-0.0)    | 0.2 (0.0-0.8)    | 0.2 (0.0-0.8)    | 0.2 (0.0-0.8)    |
|                     |                    | Other                       | 0.3 (0.2-0.5)    | 0.7 (0.5-1.0)    | 0.9 (0.6-1.3)    | 1.3 (1.0-1.8)    | 1.7 (1.2-2.3)    | 2.5 (1.7-3.5)    | 2.9 (2.0-4.2)    |

Supplementary Table 4 cont.

| State                 |                    |                             | Year 1           | Year 2           | Year 3           | Year 4           | Year 5           | Year 6           | Year 7           |
|-----------------------|--------------------|-----------------------------|------------------|------------------|------------------|------------------|------------------|------------------|------------------|
| Radical prostatectomy | Work               |                             | 95.1 (94.6-95.6) | 96.0 (95.5-96.5) | 96.0 (95.5-96.5) | 95.1 (94.4-95.7) | 94.0 (93.1-94.8) | 93.5 (92.4-94.4) | 92.6 (91.2-93.8) |
|                       | Sick leave         | All-cause                   | 4.7 (4.3-5.2)    | 3.5 (3.1-4.0)    | 3.0 (2.6-3.5)    | 3.5 (3.0-4.1)    | 3.9 (3.3-4.7)    | 3.6 (2.8-4.5)    | 3.8 (2.9-5.1)    |
|                       |                    | Prostate cancer             | 2.6 (2.3-3.0)    | 0.8 (0.6-1.1)    | 0.4 (0.3-0.6)    | 0.3 (0.2-0.5)    | 0.3 (0.2-0.6)    | 0.2 (0.1-0.6)    | 0.6 (0.3-1.2)    |
|                       |                    | Depression, anxiety, stress | 0.4 (0.3-0.5)    | 0.5 (0.3-0.7)    | 0.5 (0.3-0.7)    | 0.6 (0.4-0.9)    | 0.8 (0.5-1.2)    | 0.6 (0.4-1.1)    | 0.7 (0.3-1.3)    |
|                       |                    | Other                       | 1.7 (1.5-2.0)    | 2.2 (1.9-2.6)    | 2.1 (1.8-2.6)    | 2.7 (2.2-3.2)    | 2.9 (2.3-3.5)    | 2.7 (2.1-3.5)    | 2.6 (1.8-3.6)    |
|                       | Disability pension | All-cause                   | 0.0 (0.0- 0.1)   | 0.1 (0.1-0.2)    | 0.4 (0.3-0.6)    | 0.5 (0.3-0.7)    | 0.8 (0.6-1.1)    | 1.2 (0.9-1.6)    | 1.6 (1.2-2.2)    |
|                       |                    | Prostate cancer             | 0.0 (0.0-0.0)    | 0.0 (0.0-0.1)    | 0.1 (0.0-0.2)    | 0.1 (0.0-0.2)    | 0.1 (0.0-0.3)    | 0.2 (0.1-0.3)    | 0.2 (0.1-0.3)    |
|                       |                    | Other                       | 0.0 (0.0-0.1)    | 0.1 (0.0-0.2)    | 0.3 (0.2-0.5)    | 0.4 (0.3-0.6)    | 0.7 (0.5-1.0)    | 1.1 (0.8-1.5)    | 1.4 (1.0-2.0)    |
|                       | Death              | All-cause                   | 0.1 (0.1-0.3)    | 0.3 (0.2-0.5)    | 0.6 (0.4-0.8)    | 0.9 (0.7-1.2)    | 1.2 (1.0-1.6)    | 1.8 (1.4-2.3)    | 2.0 (1.5-2.5)    |
|                       |                    | Prostate cancer             | 0.0 (0.0-0.0)    | 0.0 (0.0-0.1)    | 0.0 (0.0-0.1)    | 0.1 (0.1-0.3)    | 0.1 (0.1-0.3)    | 0.3 (0.1-0.5)    | 0.3 (0.1-0.5)    |
|                       |                    | Other                       | 0.1 (0.1-0.3)    | 0.3 (0.2-0.5)    | 0.5 (0.4-0.7)    | 0.8 (0.6-1.0)    | 1.1 (0.8-1.4)    | 1.5 (1.1-1.9)    | 1.7 (1.3-2.2)    |

Supplementary Table 4 cont.

| State        |            | Year 1                      | Year 2           | Year 3           | Year 4           | Year 5           | Year 6           | Year 7           |                |               |
|--------------|------------|-----------------------------|------------------|------------------|------------------|------------------|------------------|------------------|----------------|---------------|
| Radiotherapy | Work       | 93.6 (92.2-94.8)            | 93.5 (92.0-94.8) | 94.4 (92.7-95.7) | 92.4 (90.3-94.2) | 91.9 (89.3-93.9) | 89.7 (86.3-92.3) | 87.1 (82.4-90.8) |                |               |
|              | Sick leave | All-cause                   | 6.3 (5.2-7.7)    | 6.0 (4.7-7.5)    | 4.5 (3.3-6.0)    | 5.0 (3.6-7.0)    | 4.3 (2.8-6.5)    | 4.9 (3.0-7.9)    | 6.6 (3.7-11.2) |               |
|              |            | Prostate cancer             | 3.3 (2.4-4.3)    | 1.2 (0.7-1.9)    | 0.6 (0.3-1.4)    | 0.5 (0.2-1.4)    | 0.7 (0.2-1.9)    | 0.6 (0.1-2.3)    | 0.4 (0.1-3.2)  |               |
|              |            | Depression, anxiety, stress | 0.3 (0.1-0.8)    | 0.5 (0.3-1.2)    | 0.7 (0.3-1.4)    | 1.2 (0.6-2.2)    | 0.4 (0.1-1.7)    | 0.3 (0.0-2.1)    | 2.0 (0.7-5.2)  |               |
|              | Other      |                             | 2.7 (2.0-3.7)    | 4.2 (3.2-5.6)    | 3.1 (2.2-4.5)    | 3.3 (2.2-5.0)    | 3.2 (2.0-5.2)    | 4.0 (2.4-6.9)    | 4.1 (2.0-8.3)  |               |
|              |            | Disability pension          | All-cause        | 0.0 (0.0-0.0)    | 0.2 (0.0-0.7)    | 0.6 (0.3-1.3)    | 1.3 (0.8-2.4)    | 1.8 (1.1-3.2)    | 2.9 (1.8-4.8)  | 3.8 (2.3-6.2) |
|              |            |                             | Prostate cancer  | 0.0 (0.0-0.0)    | 0.0 (0.0-0.0)    | 0.1 (0.0-0.6)    | 0.1 (0.0-0.6)    | 0.1 (0.0-0.6)    | 0.1 (0.0-0.6)  | 0.1 (0.0-0.6) |
|              | Other      |                             | 0.0 (0.0-0.0)    | 0.2 (0.0-0.7)    | 0.5 (0.2-1.2)    | 1.3 (0.7-2.3)    | 1.7 (1.0-3.1)    | 2.8 (1.6-4.6)    | 3.7 (2.2-6.2)  |               |
|              | Death      | All-cause                   | 0.1 (0.0-0.5)    | 0.3 (0.1-0.8)    | 0.5 (0.2-1.1)    | 1.2 (0.6-2.1)    | 1.9 (1.1-3.3)    | 2.5 (1.5-4.2)    | 2.5 (1.5-4.2)  |               |
|              |            | Prostate cancer             | 0.0 (0.0-0.0)    | 0.1 (0.0-0.6)    | 0.1 (0.0-0.6)    | 0.1 (0.0-0.6)    | 0.3 (0.1-1.4)    | 0.3 (0.1-1.4)    | 0.3 (0.1-1.4)  |               |
|              |            | Other                       | 0.1 (0.0-0.5)    | 0.2 (0.1-0.7)    | 0.4 (0.2-1.0)    | 1.1 (0.6-2.0)    | 1.7 (0.9-2.9)    | 2.2 (1.3-3.8)    | 2.2 (1.3-3.8)  |               |



Supplementary Table 4 cont.

| State                    |                    |                             | Year 1           | Year 2           | Year 3           | Year 4           | Year 5           | Year 6           | Year 7           |
|--------------------------|--------------------|-----------------------------|------------------|------------------|------------------|------------------|------------------|------------------|------------------|
| Prostate cancer-free men | Work               |                             | 97.2 (97.0-97.3) | 96.4 (96.2-96.5) | 95.5 (95.3-95.8) | 94.7 (94.4-94.9) | 93.7 (93.3-94.0) | 93.1 (92.7-93.5) | 91.8 (91.3-92.4) |
|                          | Sick leave         | All-cause                   | 2.5 (2.4-2.6)    | 2.8 (2.6-2.9)    | 3.0 (2.8-3.2)    | 3.2 (3.0-3.4)    | 3.5 (3.2-3.8)    | 3.3 (3.0-3.7)    | 3.8 (3.4-4.3)    |
|                          |                    | Prostate cancer             | 0.0 (0.0-0.0)    | 0.0 (0.0-0.0)    | 0.0 (0.0-0.0)    | 0.0 (0.0-0.0)    | 0.0 (0.0-0.0)    | 0.0 (0.0-0.0)    | 0.0 (0.0-0.0)    |
|                          |                    | Depression, anxiety, stress | 0.4 (0.3-0.4)    | 0.4 (0.4-0.5)    | 0.5 (0.4-0.5)    | 0.5 (0.4-0.6)    | 0.6 (0.5-0.7)    | 0.6 (0.5-0.8)    | 0.7 (0.5-0.9)    |
|                          |                    | Other                       | 2.1 (2.0-2.2)    | 2.3 (2.2-2.5)    | 2.6 (2.4-2.7)    | 2.7 (2.5-2.9)    | 2.9 (2.6-3.1)    | 2.7 (2.4-3.0)    | 3.1 (2.7-3.6)    |
|                          | Disability pension | All-cause                   | 0.1 (0.0-0.1)    | 0.2 (0.1-0.2)    | 0.4 (0.3-0.4)    | 0.7 (0.6-0.7)    | 0.9 (0.8-1.1)    | 1.3 (1.1-1.5)    | 1.5 (1.3-1.7)    |
|                          |                    | Prostate cancer             | 0.0 (0.0-0.0)    | 0.0 (0.0-0.0)    | 0.0 (0.0-0.0)    | 0.0 (0.0-0.0)    | 0.0 (0.0-0.0)    | 0.0 (0.0-0.0)    | 0.0 (0.0-0.0)    |
|                          |                    | Other                       | 0.1 (0.0-0.1)    | 0.2 (0.1-0.2)    | 0.4 (0.3-0.4)    | 0.7 (0.6-0.7)    | 0.9 (0.8-1.1)    | 1.3 (1.1-1.5)    | 1.5 (1.3-1.7)    |
|                          | Death              | All-cause                   | 0.3 (0.3-0.4)    | 0.7 (0.6-0.8)    | 1.1 (1.0-1.2)    | 1.5 (1.4-1.6)    | 1.9 (1.8-2.1)    | 2.3 (2.1-2.5)    | 2.8 (2.6-3.1)    |
|                          |                    | Prostate cancer             | 0.0 (0.0-0.0)    | 0.0 (0.0-0.0)    | 0.0 (0.0-0.0)    | 0.0 (0.0-0.0)    | 0.0 (0.0-0.0)    | 0.0 (0.0-0.0)    | 0.0 (0.0-0.0)    |
|                          |                    | Other                       | 0.3 (0.3-0.4)    | 0.7 (0.6-0.8)    | 1.1 (1.0-1.1)    | 1.5 (1.4-1.6)    | 1.9 (1.8-2.1)    | 2.3 (2.1-2.5)    | 2.8 (2.6-3.1)    |

**Supplementary Table 5.** Mean length of stay on work, sick leave, disability pension, and death within the first five years after diagnosis, stratified by risk category

| State                    |                             | Active surveillance            | Radical prostatectomy          | Radiotherapy                   |
|--------------------------|-----------------------------|--------------------------------|--------------------------------|--------------------------------|
|                          |                             | Length of stay*, days (95% CI) | Length of stay*, days (95% CI) | Length of stay*, days (95% CI) |
| <b>Low-risk</b>          |                             |                                |                                |                                |
| Work                     |                             | 1737 (1728-1745)               | 1726 (1719-1734)               | 1709 (1685-1734)               |
| Sick leave               | All-cause                   | 66 (60-73)                     | 87 (81-93)                     | 96 (78-115)                    |
|                          | Prostate cancer             | 15 (13-18)                     | 40 (38-42)                     | 36 (28-44)                     |
|                          | Depression, anxiety, stress | 9 (6-11)                       | 9 (7-12)                       | 9 (3-16)                       |
| Disability pension       | Other                       | 42 (36-48)                     | 38 (33-43)                     | 51 (38-64)                     |
|                          | All-cause                   | 8 (5-11)                       | 4 (2-6)                        | 12 (4-20)                      |
|                          | Prostate cancer             | 0 (0-1)                        | 0 (0-0)                        | 2 (0-5)                        |
| Death                    | Other                       | 8 (5-11)                       | 4 (2-6)                        | 10 (2-18)                      |
|                          | All-cause                   | 15 (10-20)                     | 9 (5-12)                       | 9 (0-17)                       |
|                          | Prostate cancer             | 0 (0-0)                        | 0 (0-1)                        | 0 (0-0)                        |
| Other                    | All-cause                   | 15 (10-20)                     | 8 (5-12)                       | 9 (0-17)                       |
|                          | Prostate cancer             |                                |                                |                                |
|                          | Other                       |                                |                                |                                |
| <b>Intermediate-risk</b> |                             |                                |                                |                                |
| Work                     |                             | 1722 (1698-1746)               | 1708 (1700-1716)               | 1667 (1643-1691)               |
| Sick leave               | All-cause                   | 83 (65-101)                    | 102 (96-109)                   | 135 (115-154)                  |
|                          | Prostate cancer             | 24 (16-31)                     | 51 (48-54)                     | 50 (42-58)                     |
|                          | Depression, anxiety, stress | 13 (3-23)                      | 10 (8-13)                      | 14 (5-23)                      |
| Disability pension       | Other                       | 47 (35-60)                     | 42 (36-47)                     | 70 (54-86)                     |
|                          | All-cause                   | 6 (0-14)                       | 6 (4-9)                        | 12 (4-20)                      |
|                          | Prostate cancer             | 0 (0-0)                        | 2 (1-3)                        | 0 (0-0)                        |
| Death                    | Other                       | 6 (0-14)                       | 4 (2-6)                        | 12 (4-20)                      |
|                          | All-cause                   | 15 (5-26)                      | 10 (6-13)                      | 13 (3-22)                      |
|                          | Prostate cancer             | 2 (0-4)                        | 2 (0-3)                        | 2 (0-5)                        |
| Other                    | Other                       | 14 (2-25)                      | 8 (5-11)                       | 11 (2-19)                      |
|                          | Other                       |                                |                                |                                |

\* Number of days may not add up because of rounding

**Supplementary Table 6.** Percentage of sick leave spent by men remaining in initial treatment group and by men with secondary treatment by time since diagnosis

| State |                             |                 | Secondary treatment* | Year 1        | Year 2        | Year 3        | Year 4        | Year 5        | Year 6        | Year 7        |
|-------|-----------------------------|-----------------|----------------------|---------------|---------------|---------------|---------------|---------------|---------------|---------------|
| AS    | Sick leave                  | All-cause       | All men              | 3.8 (3.3-4.4) | 4.1 (3.5-4.8) | 4.6 (3.8-5.6) | 3.9 (3.0-5.0) | 3.1 (2.2-4.5) | 2.3 (1.3-4.0) | 4.2 (2.4-7.0) |
|       |                             |                 | None                 | 2.3 (1.9-2.8) | 2.4 (2.0-3.0) | 2.7 (2.1-3.5) | 2.4 (1.7-3.3) | 1.4 (0.8-2.4) | 1.3 (0.6-2.7) | 2.1 (1.0-4.3) |
|       |                             |                 | RT                   | 0.2 (0.1-0.4) | 0.2 (0.1-0.5) | 0.2 (0.1-0.5) | 0.3 (0.1-0.7) | 0.3 (0.1-1.0) | 0.3 (0.1-1.2) | 0.3 (0.0-2.4) |
|       |                             |                 | RP                   | 1.3 (1.0-1.6) | 1.3 (1.0-1.8) | 1.5 (1.1-2.1) | 0.9 (0.5-1.6) | 1.4 (0.8-2.4) | 0.6 (0.2-1.9) | 1.4 (0.6-3.5) |
|       |                             |                 | ADT                  | 0.0 (0.0-0.0) | 0.1 (0.0-0.3) | 0.1 (0.0-0.3) | 0.2 (0.1-0.6) | 0.0 (0.0-0.0) | 0.0 (0.0-0.0) | 0.2 (0.0-1.5) |
|       |                             | Prostate cancer | All men              | 1.3 (1.0-1.7) | 1.3 (0.9-1.7) | 1.1 (0.8-1.7) | 0.8 (0.5-1.4) | 0.4 (0.2-1.2) | 0.0 (0.0-0.0) | 0.6 (0.1-2.4) |
|       |                             |                 | None                 | 0.1 (0.1-0.3) | 0.1 (0.0-0.2) | 0.2 (0.1-0.6) | 0.1 (0.0-0.5) | 0.0 (0.0-0.0) | 0.0 (0.0-0.0) | 0.0 (0.0-0.0) |
|       |                             |                 | RT                   | 0.1 (0.0-0.3) | 0.1 (0.0-0.3) | 0.1 (0.0-0.4) | 0.1 (0.0-0.6) | 0.1 (0.0-0.8) | 0.0 (0.0-0.0) | 0.0 (0.0-0.0) |
|       |                             |                 | RP                   | 1.1 (0.8-1.5) | 1.1 (0.8-1.5) | 0.8 (0.5-1.2) | 0.4 (0.2-0.9) | 0.3 (0.1-1.0) | 0.1 (0.0-1.0) | 0.4 (0.1-2.5) |
|       |                             |                 | ADT                  | 0.0 (0.0-0.0) | 0.0 (0.0-0.2) | 0.0 (0.0-0.3) | 0.2 (0.0-0.5) | 0.0 (0.0-0.0) | 0.0 (0.0-0.0) | 0.2 (0.0-1.4) |
|       | Depression, anxiety, stress | All men         | 0.4 (0.2-0.6)        | 0.6 (0.4-0.9) | 0.8 (0.5-1.2) | 0.3 (0.1-0.8) | 0.4 (0.2-1.0) | 0.6 (0.2-1.7) | 0.3 (0.0-1.8) |               |
|       |                             | None            | 0.3 (0.2-0.5)        | 0.5 (0.3-0.8) | 0.4 (0.2-0.8) | 0.2 (0.1-0.6) | 0.2 (0.0-0.8) | 0.5 (0.2-1.5) | 0.2 (0.0-1.7) |               |
|       |                             | RT              | 0.0 (0.0-0.0)        | 0.0 (0.0-0.2) | 0.0 (0.0-0.2) | 0.0 (0.0-0.2) | 0.1 (0.0-0.6) | 0.0 (0.0-0.0) | 0.0 (0.0-0.0) |               |
|       |                             | RP              | 0.1 (0.0-0.2)        | 0.1 (0.0-0.3) | 0.3 (0.1-0.6) | 0.0 (0.0-0.0) | 0.1 (0.0-0.6) | 0.0 (0.0-0.0) | 0.0 (0.0-0.0) |               |
|       |                             | ADT             | 0.0 (0.0-0.0)        | 0.0 (0.0-0.2) | 0.0 (0.0-0.2) | 0.0 (0.0-0.2) | 0.0 (0.0-0.2) | 0.2 (0.0-1.1) | 0.2 (0.0-1.1) |               |
|       | Other                       | All men         | 2.1 (1.7-2.5)        | 2.2 (1.8-2.8) | 2.7 (2.1-3.5) | 2.7 (2.0-3.7) | 2.3 (1.5-3.4) | 1.7 (0.9-3.2) | 3.4 (1.9-6.1) |               |
|       |                             | None            | 1.9 (1.5-2.3)        | 1.9 (1.5-2.4) | 2.1 (1.5-2.7) | 2.0 (1.4-2.9) | 1.2 (0.7-2.1) | 0.8 (0.3-2.0) | 1.9 (0.8-4.1) |               |
|       |                             | RT              | 0.1 (0.0-0.2)        | 0.1 (0.0-0.3) | 0.1 (0.0-0.4) | 0.1 (0.0-0.5) | 0.1 (0.0-0.7) | 0.3 (0.1-1.2) | 0.3 (0.0-2.4) |               |
|       |                             | RP              | 0.1 (0.0-0.3)        | 0.2 (0.1-0.4) | 0.5 (0.3-0.9) | 0.5 (0.2-1.0) | 0.9 (0.5-1.8) | 0.6 (0.2-1.8) | 1.1 (0.4-3.0) |               |
|       |                             | ADT             | 0.0 (0.0-0.0)        | 0.1 (0.0-0.2) | 0.0 (0.0-0.3) | 0.1 (0.0-0.4) | 0.0 (0.0-0.0) | 0.0 (0.0-0.0) | 0.0 (0.0-0.0) |               |

Supplementary Table 6 cont.

| State |                             |           | Secondary treatment* | Year 1        | Year 2        | Year 3        | Year 4        | Year 5        | Year 6        | Year 7        |
|-------|-----------------------------|-----------|----------------------|---------------|---------------|---------------|---------------|---------------|---------------|---------------|
| RP    | Sick leave                  | All-cause | All men              | 4.7 (4.3-5.2) | 3.5 (3.1-4.0) | 3.0 (2.6-3.5) | 3.5 (3.0-4.1) | 3.9 (3.3-4.7) | 3.6 (2.8-4.5) | 3.8 (2.9-5.1) |
|       |                             |           | None                 | 4.0 (3.6-4.4) | 2.8 (2.4-3.2) | 2.3 (1.9-2.8) | 2.7 (2.3-3.3) | 2.9 (2.4-3.6) | 2.8 (2.1-3.6) | 2.9 (2.1-4.0) |
|       |                             |           | RT                   | 0.7 (0.6-0.9) | 0.6 (0.4-0.8) | 0.5 (0.3-0.7) | 0.6 (0.4-0.9) | 0.6 (0.4-1.0) | 0.6 (0.3-1.0) | 0.4 (0.2-0.9) |
|       |                             |           | ADT                  | 0.0 (0.0-0.1) | 0.2 (0.1-0.3) | 0.2 (0.1-0.4) | 0.2 (0.1-0.4) | 0.4 (0.2-0.7) | 0.2 (0.1-0.5) | 0.5 (0.3-1.1) |
|       | Prostate cancer             | All men   | All men              | 2.6 (2.3-3.0) | 0.8 (0.6-1.1) | 0.4 (0.3-0.6) | 0.3 (0.2-0.5) | 0.3 (0.2-0.6) | 0.2 (0.1-0.6) | 0.6 (0.3-1.2) |
|       |                             |           | None                 | 2.0 (1.7-2.3) | 0.4 (0.3-0.6) | 0.2 (0.1-0.3) | 0.1 (0.0-0.2) | 0.1 (0.0-0.3) | 0.0 (0.0-0.0) | 0.0 (0.0-0.0) |
|       |                             |           | RT                   | 0.6 (0.5-0.8) | 0.3 (0.2-0.5) | 0.1 (0.1-0.3) | 0.1 (0.1-0.3) | 0.1 (0.0-0.4) | 0.1 (0.0-0.4) | 0.2 (0.0-0.6) |
|       |                             |           | ADT                  | 0.0 (0.0-0.1) | 0.1 (0.1-0.2) | 0.1 (0.1-0.3) | 0.1 (0.0-0.2) | 0.1 (0.1-0.4) | 0.1 (0.0-0.4) | 0.4 (0.2-0.9) |
|       | Depression, anxiety, stress | All men   | All men              | 0.4 (0.3-0.5) | 0.5 (0.3-0.7) | 0.5 (0.3-0.7) | 0.6 (0.4-0.9) | 0.8 (0.5-1.2) | 0.6 (0.4-1.1) | 0.7 (0.3-1.3) |
|       |                             |           | None                 | 0.4 (0.3-0.5) | 0.4 (0.3-0.6) | 0.4 (0.3-0.6) | 0.5 (0.3-0.8) | 0.7 (0.4-1.1) | 0.6 (0.3-1.0) | 0.6 (0.3-1.2) |
|       |                             |           | RT                   | 0.0 (0.0-0.1) | 0.1 (0.0-0.2) | 0.1 (0.0-0.2) | 0.1 (0.0-0.3) | 0.1 (0.0-0.3) | 0.1 (0.0-0.4) | 0.1 (0.0-0.5) |
|       |                             |           | ADT                  | 0.0 (0.0-0.0) | 0.0 (0.0-0.0) | 0.0 (0.0-0.2) | 0.0 (0.0-0.0) | 0.0 (0.0-0.0) | 0.0 (0.0-0.0) | 0.0 (0.0-0.0) |
|       | Other                       | All men   | All men              | 1.7 (1.5-2.0) | 2.2 (1.9-2.6) | 2.1 (1.8-2.6) | 2.7 (2.2-3.2) | 2.9 (2.3-3.5) | 2.7 (2.1-3.5) | 2.6 (1.8-3.6) |
|       |                             |           | None                 | 1.7 (1.4-2.0) | 1.9 (1.6-2.3) | 1.8 (1.4-2.2) | 2.2 (1.8-2.7) | 2.2 (1.7-2.8) | 2.2 (1.6-3.0) | 2.3 (1.5-3.3) |
|       |                             |           | RT                   | 0.1 (0.0-0.2) | 0.2 (0.1-0.3) | 0.3 (0.2-0.5) | 0.4 (0.2-0.6) | 0.4 (0.2-0.7) | 0.4 (0.2-0.8) | 0.2 (0.0-0.6) |
|       |                             |           | ADT                  | 0.0 (0.0-0.0) | 0.1 (0.0-0.2) | 0.1 (0.0-0.2) | 0.1 (0.0-0.3) | 0.2 (0.1-0.5) | 0.1 (0.0-0.4) | 0.2 (0.0-0.6) |

Supplementary Table 6 cont.

| State |                             |           | Secondary treatment* | Year 1        | Year 2        | Year 3        | Year 4        | Year 5        | Year 6        | Year 7         |
|-------|-----------------------------|-----------|----------------------|---------------|---------------|---------------|---------------|---------------|---------------|----------------|
| RT    | Sick leave                  | All-cause | All men              | 6.3 (5.2-7.7) | 6.0 (4.7-7.5) | 4.5 (3.3-6.0) | 5.0 (3.6-7.0) | 4.3 (2.8-6.5) | 4.9 (3.0-7.9) | 6.6 (3.7-11.2) |
|       |                             |           | None                 | 6.1 (5.0-7.5) | 5.8 (4.6-7.3) | 4.2 (3.0-5.7) | 4.5 (3.2-6.4) | 3.7 (2.4-5.8) | 3.7 (2.1-6.4) | 4.9 (2.6-9.3)  |
|       |                             |           | ADT                  | 0.2 (0.1-0.6) | 0.2 (0.0-0.7) | 0.3 (0.1-1.0) | 0.5 (0.2-1.5) | 0.5 (0.1-1.9) | 1.2 (0.4-3.1) | 1.6 (0.6-4.7)  |
|       | Prostate cancer             | All men   | All men              | 3.3 (2.4-4.3) | 1.2 (0.7-1.9) | 0.6 (0.3-1.4) | 0.5 (0.2-1.4) | 0.7 (0.2-1.9) | 0.6 (0.1-2.3) | 0.4 (0.1-3.2)  |
|       |                             |           | None                 | 3.3 (2.4-4.3) | 1.1 (0.6-1.8) | 0.3 (0.1-1.0) | 0.4 (0.1-1.3) | 0.3 (0.1-1.3) | 0.0 (0.0-0.0) | 0.0 (0.0-0.0)  |
|       |                             |           | ADT                  | 0.0 (0.0-0.0) | 0.1 (0.0-0.6) | 0.4 (0.1-1.1) | 0.1 (0.0-0.8) | 0.2 (0.0-1.6) | 0.6 (0.1-2.3) | 0.3 (0.0-2.1)  |
|       | Depression, anxiety, stress | All men   | All men              | 0.3 (0.1-0.8) | 0.5 (0.3-1.2) | 0.7 (0.3-1.4) | 1.2 (0.6-2.2) | 0.4 (0.1-1.7) | 0.3 (0.0-2.1) | 2.0 (0.7-5.2)  |
|       |                             |           | None                 | 0.3 (0.1-0.8) | 0.5 (0.3-1.2) | 0.7 (0.3-1.4) | 1.2 (0.6-2.2) | 0.4 (0.1-1.7) | 0.3 (0.0-2.1) | 1.6 (0.5-4.8)  |
|       |                             |           | ADT                  | 0.0 (0.0-0.0) | 0.0 (0.0-0.0) | 0.0 (0.0-0.0) | 0.0 (0.0-0.0) | 0.0 (0.0-0.0) | 0.0 (0.0-0.0) | 0.4 (0.1-2.7)  |
|       | Other                       | All men   | All men              | 2.7 (2.0-3.7) | 4.2 (3.2-5.6) | 3.1 (2.2-4.5) | 3.3 (2.2-5.0) | 3.2 (2.0-5.2) | 4.0 (2.4-6.9) | 4.1 (2.0-8.3)  |
|       |                             |           | None                 | 2.5 (1.8-3.4) | 4.1 (3.1-5.5) | 3.1 (2.2-4.5) | 2.9 (1.9-4.5) | 2.9 (1.8-4.9) | 3.4 (1.9-6.1) | 3.5 (1.6-7.4)  |
|       |                             |           | ADT                  | 0.2 (0.1-0.6) | 0.1 (0.0-0.6) | 0.0 (0.0-0.0) | 0.4 (0.1-1.3) | 0.3 (0.1-1.3) | 0.6 (0.2-2.4) | 0.7 (0.1-4.3)  |

Abbreviations: ADT, androgen deprivation therapy; AS, active surveillance; RT, radiotherapy; RP, radical prostatectomy

\* RP includes men treated with RP +/- RT and ADT includes men treated with ADT +/- RT/RP
